# Supplementary material
Source: PubMed Central journal article supplement (PMC6642026)
Supplement: NIHMS1030625-supplement-1.pdf [file NIHMS1030625-supplement-1.pdf]

**Supplementary File 3. Results of data extraction**

| Author             | Year | Female ACL | Male ACL | Total females | Total males | Female exposure (AE) | Male exposure (AE) | Exposure type | IR analysis |
|--------------------|------|------------|----------|---------------|-------------|----------------------|--------------------|---------------|-------------|
| Agel et al         | 2016 | 71         | 26       | 165           |             | 710000               | 650000             | AE            | T, F, M, R  |
| Beynnon et al      | 2014 | 26         | 9        |               |             | 142192               | 147381             | PD            | T, F, M, R  |
| Caraffa et al      | 1996 |            |          |               | 600         |                      |                    |               |             |
| Faude et al        | 2005 | 11         |          |               |             | 17655                |                    | PH            | T, F        |
| Gilchrist et al    | 2008 | 25         |          | 1435          |             | 88139                |                    | AE            | T, F        |
| Giza et al         | 2005 | 8          |          | 202           |             | 177778               |                    | PH            | T, F        |
| Gwinn et al        | 2000 | 22         | 31       |               |             | 39505                | 175628             | AE            | T, F, M, R  |
| Hagglund et al     | 2009 | 8          | 8        | 228           | 239         | 27078                | 35681              | PH            | T, F, M, R  |
| Heidt et al        | 2000 |            |          | 300           |             |                      |                    |               |             |
| Hewett et al       | 1999 | 2          | 1        |               |             | 13534                | 8513               | AE            | T, F, M, R  |
| Hootman et al      | 2007 | 411        | 168      |               |             | 1467857              | 1866667            | AE            | T, F, M, R  |
| Joseph et al       | 2013 | 96         | 44       |               |             | 786293               | 914551             | AE            | T, F, M, R  |
| Kiani et al        | 2010 | 5          |          | 1506          |             | 66505                |                    | PH            | T, F        |
| Krutsch et al      | 2016 |            | 16       |               | 408         |                      | 75312              | PH            | T, M        |
| LeGall et al       | 2008 | 12         |          | 119           |             | 48359                |                    | PH            | T, F        |
| Mandelbaum et al   | 2005 | 73         |          | 5703          |             | 205308               |                    | AE            | T, F        |
| Mountcastle et al  | 2007 | 51         | 302      |               |             | 409223               | 2196812            | AE            | T, F, M, R  |
| Ostenburg and Roos | 2000 | 3          |          | 123           |             | 4839                 |                    | PH            | T, F        |
| Padua et al        | 2015 |            |          | 481           | 348         |                      |                    |               |             |
| Pfeiffer et al     | 2006 | 1          |          | 433           |             | 15270                |                    | AE            | T, F        |
| Quisquater et al   | 2013 |            |          | 37170         | 796226      |                      |                    |               |             |
| Rahnama et al      | 2009 |            |          |               | 390         |                      |                    |               |             |
| Soderman et al     | 2000 | 5          |          | 140           |             | 7017                 |                    | PH            | T, F        |
| Stanley et al      | 2016 | 99         | 58       |               |             | 702128               | 950820             | AE            | T, F, M, R  |
| Steffen et al      | 2008 | 9          |          | 2020          |             | 66574                |                    | PH            | T, F        |
| Steffen et al      | 2016 |            |          | 447           |             |                      |                    |               |             |
| Tegnander et al    | 2008 | 2          |          | 181           |             | 14810                |                    | PH            | T, F        |
| Walden et al       | 2011 | 21         | 49       | 4564          | 1357        | 139149               |                    | PH            | T, F        |
| Walden et al       | 2012 | 15         | 20       | 310           | 652         | 52389                | 164923             | PH            | T, F, M, R  |

IR, incidence rate; IP, incidence proportion; ACL, anterior cruciate ligament; AE, athlete-exposure; IP, incidence player-hour; PD, player-day; T, total; F, female; M, male; R, ratio; A, amateur; I, intermediate; E, elite.

| IP analysis | Follow-up | Participation level |
|-------------|-----------|---------------------|
|             | <1 year   | I                   |
|             | <1 year   | A, I                |
| T, M        | <1 year   |                     |
| T, F        | <1 year   | E                   |
| T, F        | <1 year   | I                   |
| T, F        | <1 year   | E                   |
|             | ≥1 year   | A, I                |
| T, F, M, R  | <1 year   | E                   |
| T, F        | ≥1 year   |                     |
|             | <1 year   | A                   |
|             | <1 year   | I                   |
|             | <1 year   | A                   |
| T, F        | <1 year   | A                   |
| T, M        | <1 year   | A, E                |
| T, F        | <1 year   | E                   |
| T, F        | ≥1 year   |                     |
|             | <1 year   | A, I                |
| T, F        | <1 year   | E                   |
| T, F, M, R  | <1 year   |                     |
| T, F        | <1 year   | A                   |
| T, F, M, R  | <1 year   |                     |
| T, M        | <1 year   |                     |
| T, F        | <1 year   | E                   |
|             | <1 year   |                     |
| T, F        | <1 year   | A                   |
| T, F        | <1 year   |                     |
| T, F        | <1 year   | E                   |
| T, F        | <1 year   | A                   |
| T, F, M, R  | <1 year   | E                   |

proportion; IR, incidence rate; PH,
