# Supplementary material
Source: PubMed Central journal article supplement (PMC6642026)
Supplement: NIHMS1030625-supplement-2.pdf [file NIHMS1030625-supplement-2.pdf]

**Quality Assessment Tool for Observational  
Cohort and Cross-Sectional Studies**

| Study               | 1 | 2 | 3 | 4 | 5 | 6 | 7 | 8 | 9 | 10 | 11 | 12 | 13 | 14 | Y total |
|---------------------|---|---|---|---|---|---|---|---|---|----|----|----|----|----|---------|
| Agel et al          | Y | Y | N | Y | N | Y | Y | Y | Y | Y  | Y  | N  | N  | N  | 9       |
| Beynnon et al       | Y | Y | N | Y | N | Y | Y | Y | Y | N  | Y  | N  | N  | Y  | 9       |
| Caraffa et al       | Y | Y | Y | N | N | Y | Y | Y | N | N  | Y  | N  | N  | N  | 7       |
| Faude et al         | Y | Y | N | Y | N | Y | Y | Y | Y | Y  | N  | N  | N  | N  | 8       |
| Gilchrist et al     | Y | Y | N | Y | N | Y | Y | Y | Y | Y  | Y  | Y  | N  | N  | 10      |
| Giza et al          | Y | Y | Y | Y | N | Y | Y | Y | Y | N  | N  | N  | N  | N  | 8       |
| Gwinn et al         | Y | Y | Y | Y | N | Y | Y | Y | Y | N  | Y  | N  | N  | N  | 9       |
| Hagglund et al      | Y | Y | Y | Y | N | Y | Y | N | Y | Y  | N  | N  | Y  | N  | 9       |
| Heidt et al         | Y | N | N | N | N | N | Y | Y | N | N  | N  | N  | N  | N  | 3       |
| Hewett et al        | Y | Y | N | Y | N | Y | Y | N | Y | Y  | N  | N  | Y  | N  | 8       |
| Hootman et al       | Y | Y | N | Y | N | Y | Y | Y | Y | Y  | N  | N  | N  | N  | 8       |
| Joseph et al        | Y | Y | Y | Y | N | N | Y | N | N | N  | Y  | N  | Y  | Y  | 8       |
| Kiani et al         | Y | Y | Y | Y | N | Y | Y | Y | Y | Y  | Y  | N  | Y  | Y  | 12      |
| Krutsch et al       | Y | Y | Y | Y | N | Y | Y | N | N | Y  | Y  | N  | N  | N  | 8       |
| LeGall et al        | Y | Y | Y | Y | N | N | Y | N | N | N  | N  | N  | Y  | N  | 6       |
| Mandelbaum et al    | Y | Y | Y | Y | N | Y | Y | Y | Y | Y  | Y  | N  | N  | N  | 10      |
| Mountcastle et al   | Y | Y | Y | Y | N | Y | Y | Y | Y | N  | Y  | N  | N  | N  | 9       |
| Ostenburg and Roos  | Y | Y | Y | Y | N | Y | Y | N | N | Y  | N  | N  | Y  | N  | 8       |
| Padua et al         | Y | N | N | Y | N | Y | Y | Y | N | N  | N  | N  | N  | N  | 5       |
| Pfeiffer et al      | Y | Y | N | Y | N | Y | Y | Y | Y | Y  | Y  | N  | N  | N  | 9       |
| Quisquater et al    | Y | N | N | Y | N | N | Y | Y | N | N  | N  | N  | N  | N  | 4       |
| Rahnama et al       | Y | Y | N | Y | N | N | Y | Y | N | N  | N  | N  | N  | N  | 5       |
| Soderman et al      | Y | Y | Y | Y | N | Y | Y | Y | Y | N  | N  | N  | N  | N  | 8       |
| Steffen et al       | Y | Y | Y | Y | Y | Y | Y | Y | Y | Y  | Y  | Y  | N  | Y  | 13      |
| Steffen et al       | Y | Y | Y | Y | Y | N | Y | N | N | N  | Y  | N  | N  | N  | 7       |
| Tegnander et al     | Y | Y | Y | Y | N | Y | Y | Y | Y | N  | N  | N  | N  | N  | 8       |
| Walden et al (2012) | Y | Y | Y | Y | N | Y | Y | Y | Y | Y  | Y  | Y  | N  | Y  | 12      |
| Walden et al (2011) | Y | Y | N | Y | N | Y | Y | Y | Y | N  | N  | N  | N  | N  | 7       |

Y, present; N, not present
