# Supplementary material
Source: PubMed Central journal article supplement (PMC6642026)
Supplement: NIHMS1030625-supplement-3.pdf [file NIHMS1030625-supplement-3.pdf]

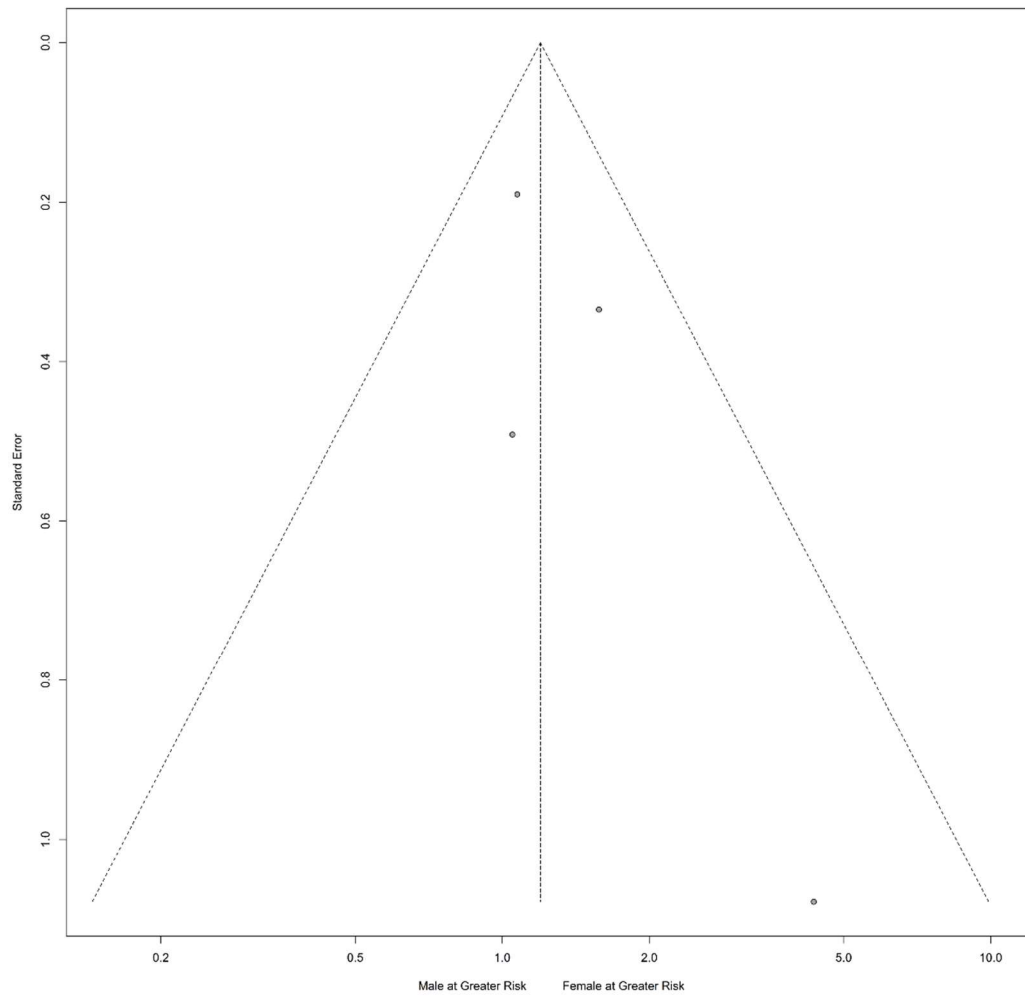

Supplementary File 3. Funnel plot to assess publication bias in studies comparing incidence proportion of ACL injury in female and male football players.
